# Supplementary material for: Micro-area investigation on electrochemical performance improvement with Co and Mn doping in PbO2 electrode materials
Source: Royal Society of Chemistry journal article supplement (doi:10.1039/d1ra04006e), 2021-01-01
Supplement: d1ra04006e1.pdf [file d1ra04006e1.pdf]

## Supplementary Information

# Micro-area investigation on electrochemical performance improvement with Co and Mn doping in PbO<sub>2</sub> electrode materials

*Ze Lv, Zhen Chen\*, Qiang Yu, Wei Zhu, Hongjun You, Bangyao Chen, Zhaoyi Zheng,*

*Yuanyuan Liu, Qi Hu*

*Faculty of Science, Kunming University of Science and Technology, Kunming 650093,  
China*

*\*Corresponding Author. E-mail: [chenzhen@kust.edu.cn](mailto:chenzhen@kust.edu.cn) (Z. Chen)*

## Theoretical calculation of RG

$$RG = \frac{rg}{a} \quad [1]$$

$$L = \frac{d}{a} \quad [2]$$

$$Ni_T(L, RG) = \frac{\frac{2.08}{RG^{0.358}} \left( L - \frac{0.145}{RG} \right) + 1.585}{\frac{2.08}{RG^{0.358}} (L + 0.0023RG) + 1.57 + \frac{\ln RG}{L} + \frac{2}{\pi RG} \ln \left( 1 + \right)} \quad [3]$$

Where  $rg$  is the radius of the insulating sheath;  $a$  is the radius of the conductive radius. The value of  $RG$  was attained from a negative approach curve operating on a piece of quartz glass.<sup>[1]</sup>

Before using the probe in each experiment, the probe must be electropolished. Electrochemically polished by cyclic voltammetry from  $-0.5$  V to  $2.0$  V in a  $0.5 \text{ mol}\cdot\text{L}^{-1}$   $\text{H}_2\text{SO}_4$  solution, and 35 cycles at least are required, the sweep rate is  $5 \text{ mV}\cdot\text{s}^{-1}$ .

## CV of the probe in the steady state during the experiment

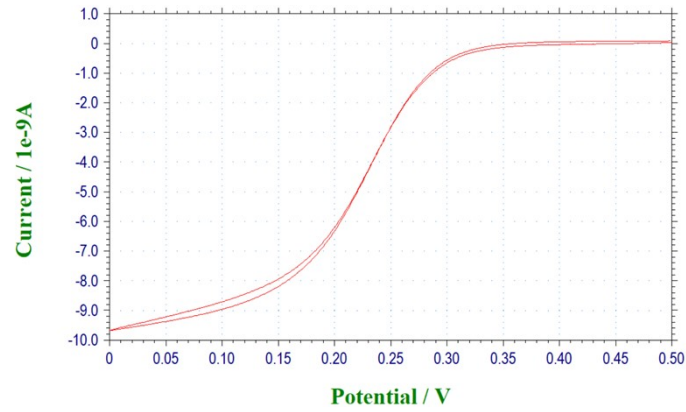

### Theoretical calculation of hemispherical diffusion

$$I_{tip,\infty} = 4nFDaC^0 \quad [4]$$

where  $n$  is the number of transferred electrons,  $F$  is the Faraday constant,  $D$  is the diffusion coefficient,  $a$  is the tip radius, and  $C^0$  the bulk concentration of the reactant.<sup>[2,3]</sup>

### Theoretical calculation of SECM tip approach curves

$$\begin{aligned}
& Ni_T(L, RG, \kappa) \\
&= Ni_T^{cond}\left(L + \frac{1}{\kappa}, RG\right) + \frac{Ni_T^{ins}(L, RG)}{(1 + 2.47RG^{0.31}L\kappa)(1 + L^{0.006RG})} \\
& [5]
\end{aligned}$$

$$\begin{aligned}
& Ni_T^{ins}(L, RG) \\
&= \frac{\frac{2.08}{RG^{0.358}}\left(L - \frac{0.145}{RG}\right) + 1.585}{\frac{2.08}{RG^{0.358}}(L + 0.0023RG) + 1.57 + \frac{\ln RG}{L} + \frac{2}{\pi H}} \\
& [6]
\end{aligned}$$

$$\begin{aligned}
& Ni_T^{cond}\left(L + \frac{1}{\kappa}, RG\right) \\
&= \alpha(RG) + \frac{1}{\tan L} \frac{\pi}{\beta(RG)4\text{ArcTan } L} + \left(1 - \alpha(RG) - \frac{1}{2\beta(RG)}\right) \\
& \text{Tan } L \quad [7]
\end{aligned}$$

$$\alpha(RG) = \ln 2 + \ln 2 \left(1 - \frac{2}{\pi} \text{ArcCos} \frac{1}{RG}\right) - \ln 2 \left[1 - \left(\frac{2}{\pi} \text{ArcCos} \frac{1}{RG}\right)\right]$$

$$\beta(RG) = 1 + 0.639 \left(1 - \frac{2}{\pi} \text{ArcCos} \frac{1}{RG}\right) - 0.186 \left[1 - \left(\frac{2}{\pi} \text{ArcCos} \frac{1}{RG}\right)\right]$$

Where  $Ni_T$ ,  $Ni_T^{ins}$  and  $Ni_T^{cond}$  represent the normalized current for a kinetically controlled substrate, an insulating substrate (i.e., no mediator generation) and a diffusion-controlled conducting substrate (i.e. fast regeneration of a redox mediator), respectively.<sup>[2,3]</sup>

## FIGURES

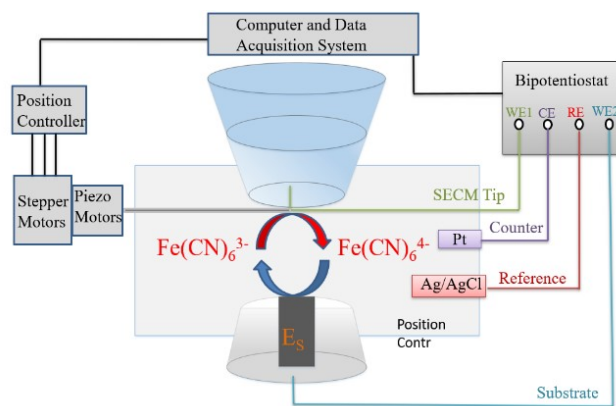

**Figure S1.** SECM Instruments

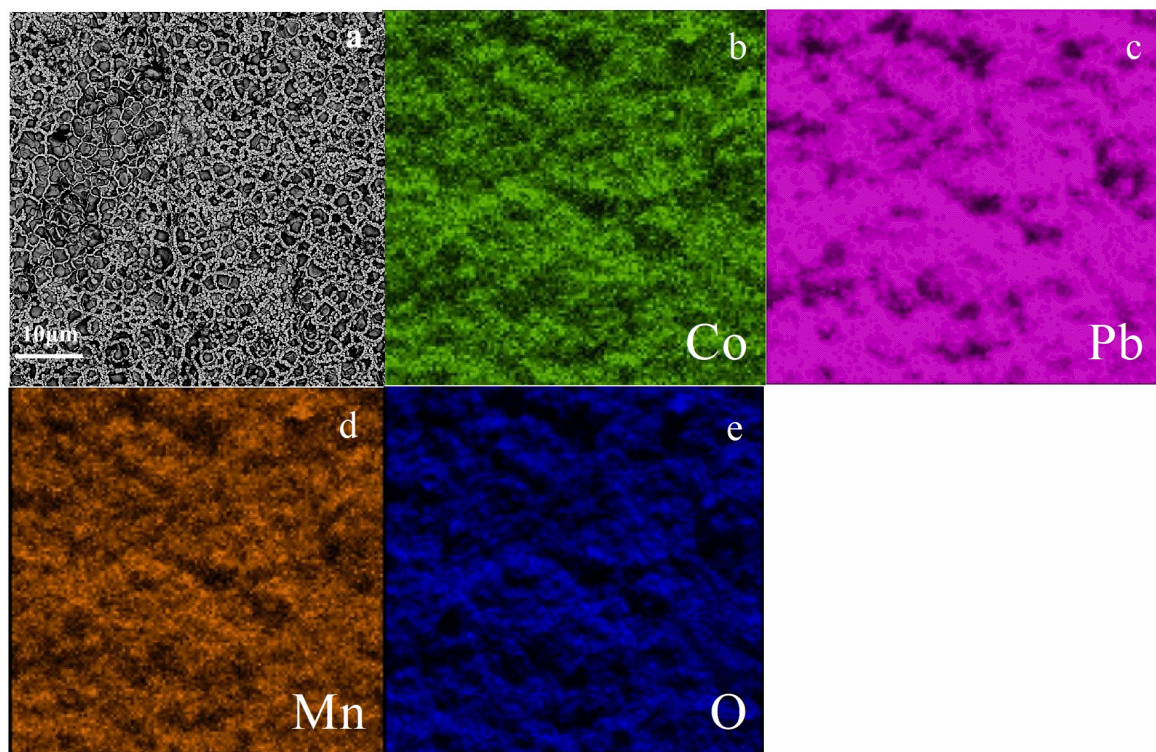

**Figure S2** SEM image along with the corresponding EDX elemental maps for individual Co, Pb, Mn and O elements of  $\text{PbO}_2\text{-Co}_3\text{O}_4\text{-MnO}_2$ .

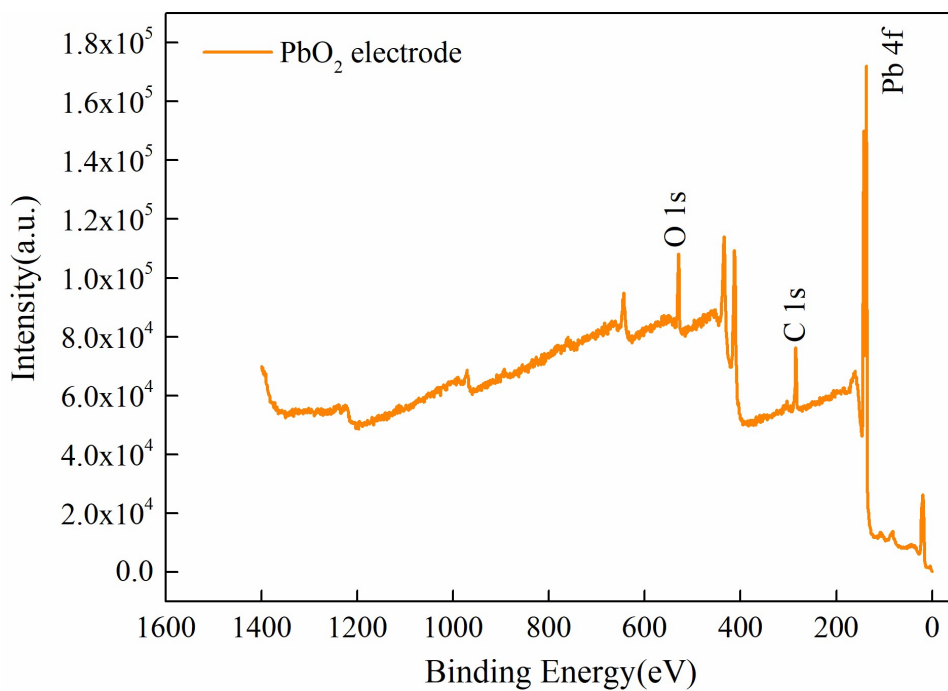

**Figure S3.** XPS spectra of PbO<sub>2</sub> electrode.

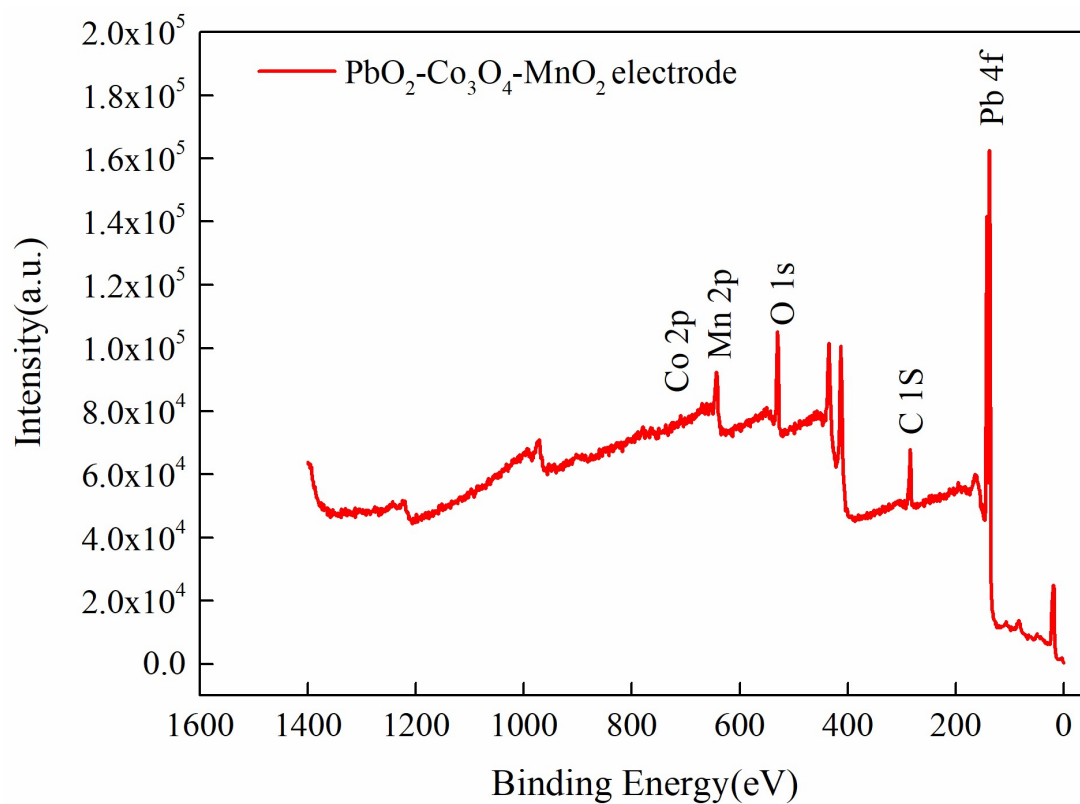

**Figure S4.** XPS spectra of PbO<sub>2</sub>-Co<sub>3</sub>O<sub>4</sub>-MnO<sub>2</sub> electrode.

## References

- [1] R. Cornut, S. Griveau, C. Lefrou, Accuracy study on fitting procedure of kinetics SECM feedback experiments, *J. Electroanal. Chem.* 2010; 650: 55-7.
- [2] Bard AJ, Fan FRF, Kwak J, Lev O. Scanning electrochemical microscopy. Introduction and principles. *Analytical Chemistry*. 1989; 61: 132-8.
- [3] Wei C, Bard AJ, Mirkin MV. Scanning Electrochemical Microscopy. 31. Application of SECM to the Study of Charge Transfer Processes at the Liquid/Liquid Interface. *The Journal of Physical Chemistry*. 1995; 99: 16033-42.
